# Supplementary material for: Retarded saturation of the areal capacitance using 3D-aligned MnO2 thin film nanostructures as a supercapacitor electrode
Source: PubMed Central journal article supplement (PMC5557763; doi:10.1038/s41598-017-09039-x), 2017-08-15
Supplement: 41598_2017_9039_MOESM1_ESM.pdf [file 41598_2017_9039_MOESM1_ESM.pdf]

## Supplementary Information

### Retarded saturation of areal capacitance using 3D-aligned MnO<sub>2</sub> thin film nanostructures as a supercapacitor electrode

Green Kim, Ilhwan Ryu and Sanggyu Yim\*

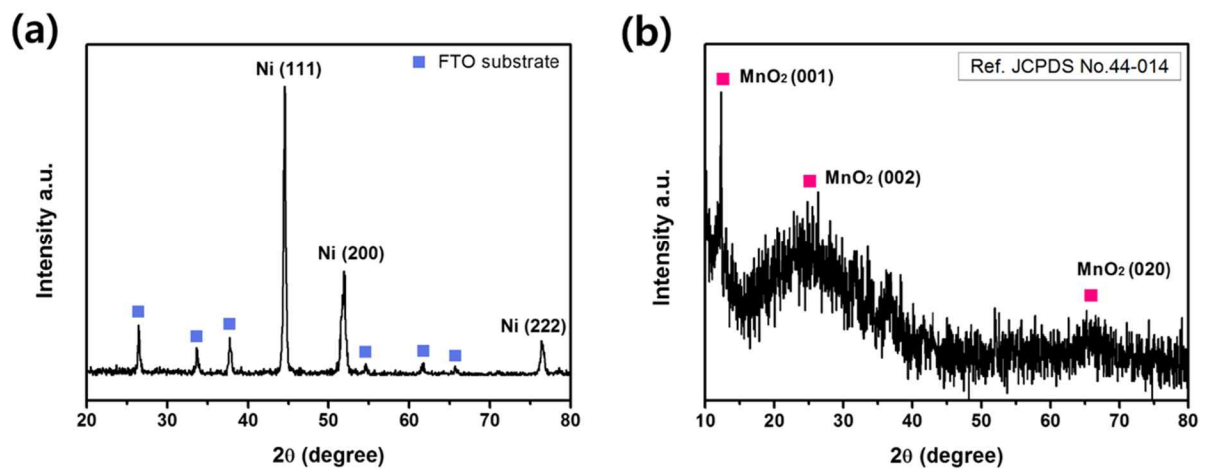

Figure S1. Powder X-ray diffraction patterns of electrodeposited (a) Ni and (b) MnO<sub>2</sub> thin films. The diffraction peaks indexed are consistent with standard data from JCPDS.

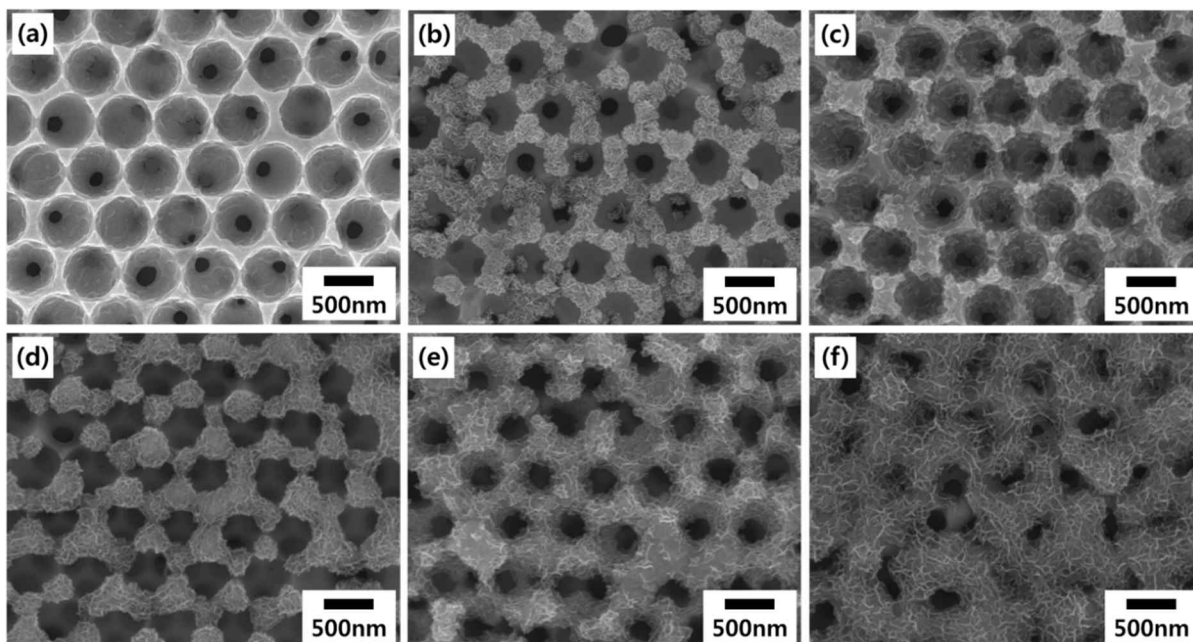

Figure S2. Surface FE-SEM images of MnO<sub>2</sub> thin films electrodeposited on 3Lyr inverse-opal Ni nanostructures. The number of electrodeposition cycles is (a) 5, (b) 10, (c) 15, (d) 20, (e) 25 and (f) 30.

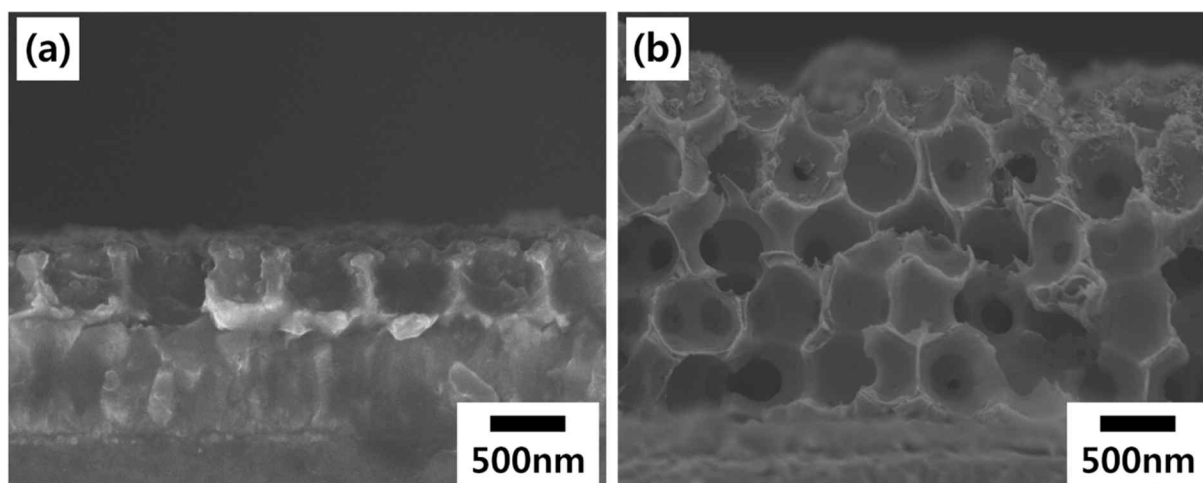

Figure S3. Cross-sectional FE-SEM images after 15 cycle electrodeposition of MnO<sub>2</sub> on the (a) 1Lyr- and (b) 5-Lyr Ni nanostructures.

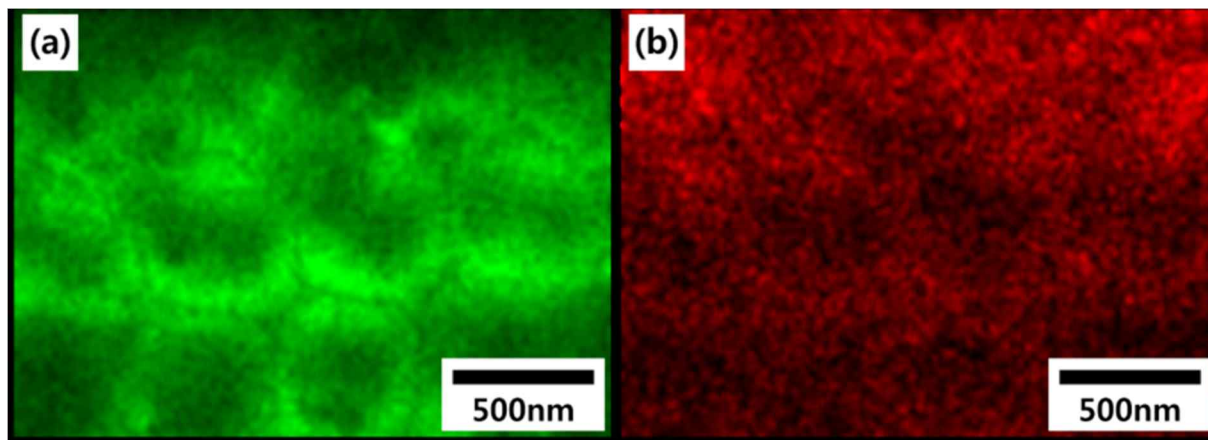

Figure S4. Cross-sectional SEM-mapping images for (a) Ni and (b) Mn atoms taken after 10 cycle electrodeposition of  $\text{MnO}_2$  on the 3Lyr Ni nanostructures.

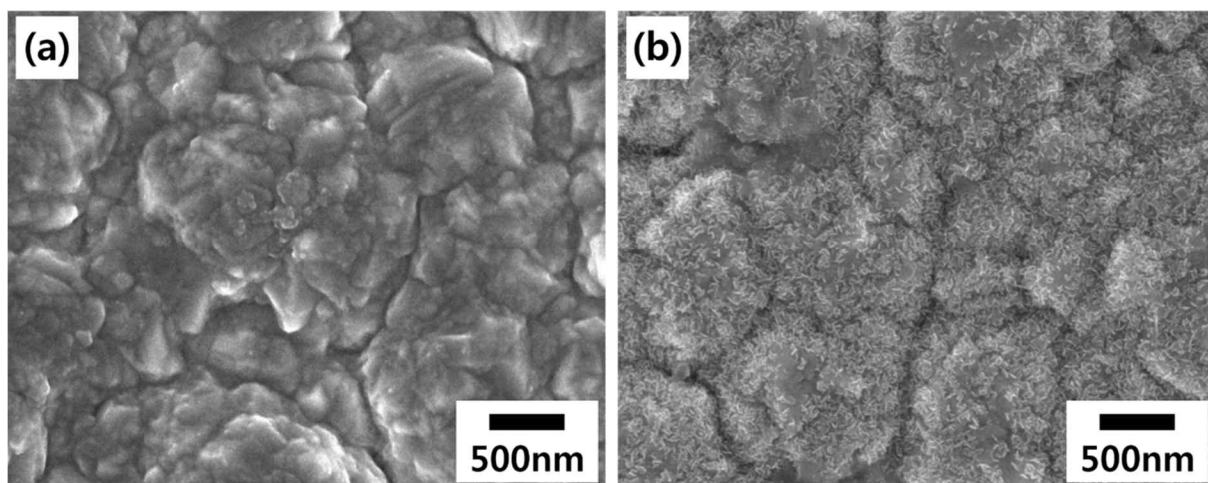

Figure S5. Surface FE-SEM images of the (a) planar Ni film and (b)  $\text{MnO}_2$  layer electrodeposited on it.

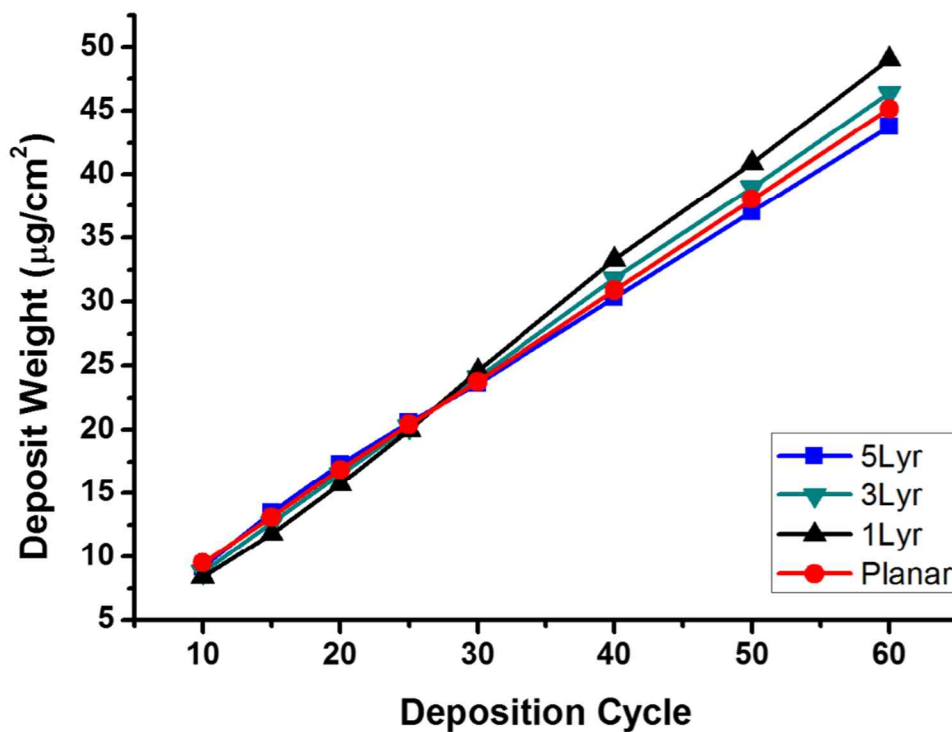

Figure S6. Plots of deposit weights of  $\text{MnO}_2$  thin films electrodeposited on the planar and nanostructured Ni current collectors as a function of the number of electrodeposition cycles.

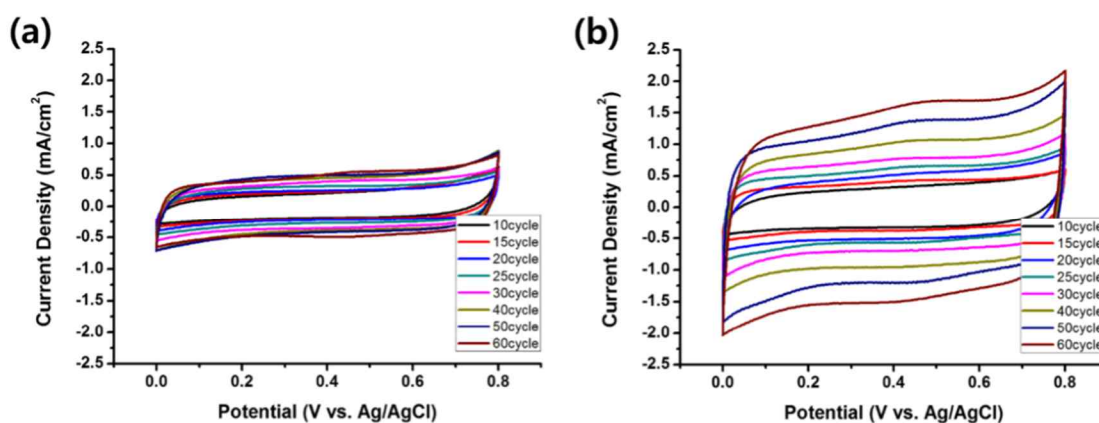

Figure S7. Cyclic voltammograms of  $\text{MnO}_2$  electrodes deposited on the (a) planar and (b) 5Lyr nanostructured Ni surface. The scan rate was  $100 \text{ mV s}^{-1}$  for both samples.

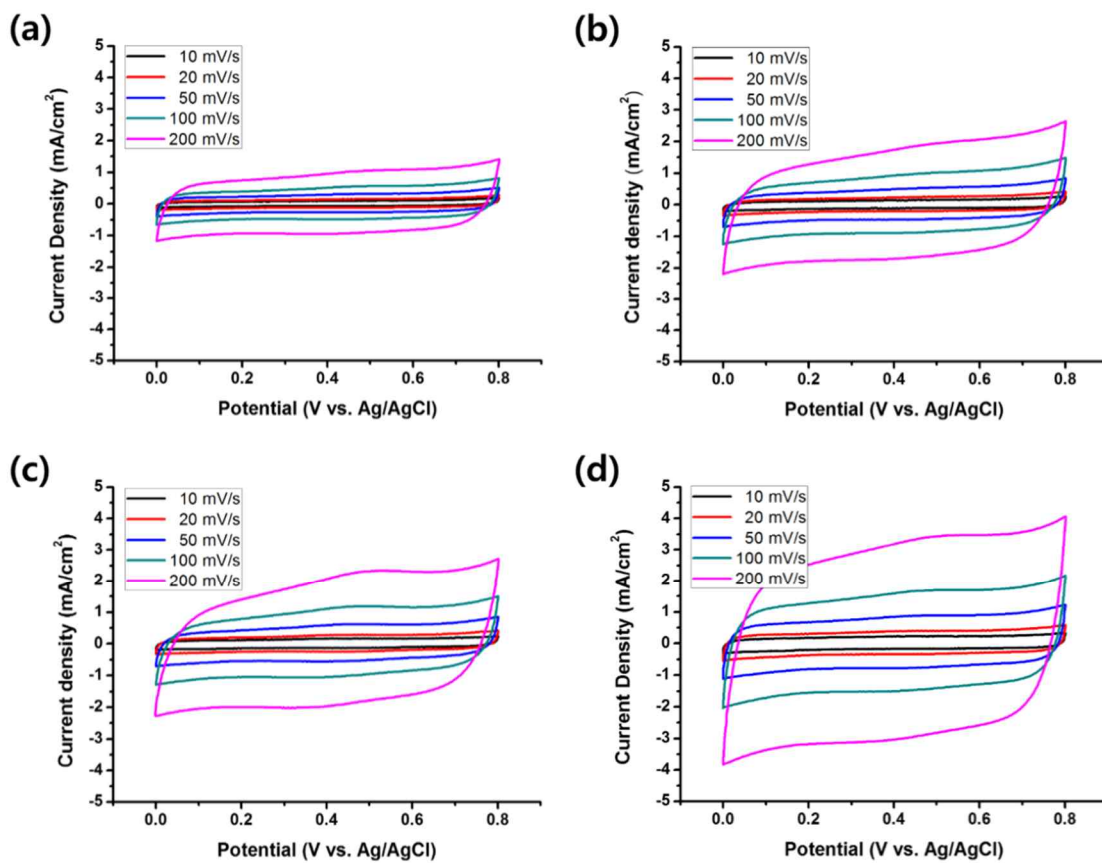

Figure S8. Cyclic voltammograms of the (a) planar, (b) 1Lyr-, (c) 3Lyr-, and (d) 5Lyr- nanostructured MnO<sub>2</sub> electrodes at various scan rates. The number of MnO<sub>2</sub> electrodeposition cycles was 60 for all samples.

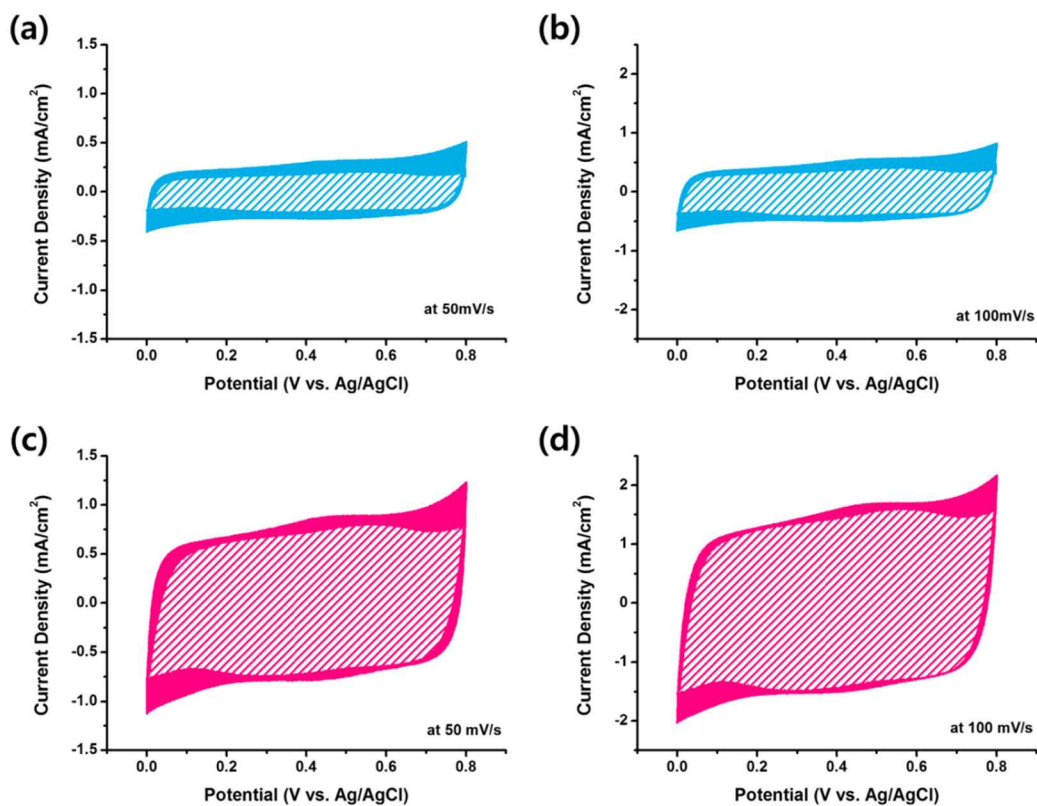

Figure S9. Deconvolution of the total capacitance into the surface capacitive (shaded part) and insertion (solid part) elements for the planar MnO<sub>2</sub> electrode at scan rates of (a) 50 mV s<sup>-1</sup> and (b) 100 mV s<sup>-1</sup>, and for the 5Lyr nanostructured MnO<sub>2</sub> electrode at scan rates of (c) 50 mV s<sup>-1</sup> and (d) 100 mV s<sup>-1</sup>.
